# Supplementary material for: Brief Report: Evaluating the Diagnostic Yield of Commercial Gene Panels in Autism
Source: J Autism Dev Disord. 2022 Jan 7;53(1):484–8. doi: 10.1007/s10803-021-05417-7 (PMC9889490; doi:10.1007/s10803-021-05417-7)
Supplement: Supplementary file 1 — Supplementary file1 (CSV 2 KB) [file 10803_2021_5417_MOESM1_ESM.csv]

Gene Panel Provider	Source
Ambry Genetics	https://www.ambrygen.com/providers/genetic-testing/62/neurology/autismnext
Asper Neurogenetics	https://www.asperbio.com/asper-neurogenetics/autism-spectrum-disorders-ngs-panel/
Blueprint Genetics	https://blueprintgenetics.com/tests/panels/neurology/autism-spectrum-disorders-panel/
Center for Human Genetics	https://www.ncbi.nlm.nih.gov/gtr/tests/529181/
Centogene	https://www.centogene.com/science/centopedia/syndromic-autism-gene-panel.html
Centogene	https://www.centogene.com/diagnostics/ngs-panels/neurology.html
EGL Genetics	https://www.egl-eurofins.com/tests/MM021
Fulgent Genetics	https://www.fulgentgenetics.com/Autism
GeneDx	https://www.genedx.com/test-catalog/available-tests/autismid-xpanded-panel/
GENETAQ	http://genetaq.com/en/catalogue/test/autism
Genomics England PanelApp	https://panelapp.genomicsengland.co.uk/panels/657/
Greenwood Genetic Centre	https://www.ggc.org/test-finder-item/syndromic-autism-sequencing-panel
GX Sciences	https://www.gxsciences.com/genetic-testing-autism-s/202.htm
MNG Laboratories	https://mnglabs.com/tests/NGS325/comprehensive-intellectual-disability-autism-ngs-panel-and-copy-number-analysis-mtdna
Munroe-Meyer Institute	https://www.unmc.edu/mmi/geneticslab/_documents/gene-lists/genelist-p-autism-v3-117.pdf
Prevention Genetics	https://www.preventiongenetics.com/testInfo?val=Autism+Spectrum+Disorders+%28ASD%29+Panel
Reference Laboratory Genomics	https://www.ncbi.nlm.nih.gov/gtr/tests/559901/overview/
Sema4	https://sema4.com/products/test-catalog/comprehensive-autism-spectrum-disorders-panel-228/
