# Supplementary material for: Brief Report: Evaluating the Diagnostic Yield of Commercial Gene Panels in Autism
Source: J Autism Dev Disord. 2022 Jan 7;53(1):484–8. doi: 10.1007/s10803-021-05417-7 (PMC9889490; doi:10.1007/s10803-021-05417-7)
Supplement: Supplementary file 2 — Supplementary file2 (CSV 82 KB) [file 10803_2021_5417_MOESM2_ESM.csv]

AmbryGenetics	AsperNeurogenetics	Blueprintgenetics	CenterForHumanGeneticslnc	Centogene	CentogeneID	EGLGenetics	FulgentGenetics	GeneDx	GENETAQ	GenomicsEngland	GreenwoodGeneticCentreDiagnosticLaboratories	GxSciences	MNGLaboratories	MunroeMeyerInstitute	PreventionGenetics	ReferenceLaboratoryGenetics	Sema4
ACSL4	ADNP	ADNP	ANKRD11	ADNP	ABAT	ADSL	ADNP	A2ML1	ARX	ABAT	ADNP	CTH	AAAS	AP1S2	ACTB	ANKRD11	ABCD1
ADNP	ADSL	BCL11A	ASTN2	ADSL	ABCD1	AFF2	ALDH5A1	AAAS	CACNA1C	ABCA10	ALDH5A1	GSTM3	AARS1	ARID1A	ADNP	AP1S2	ACSL4
AFF2	ANKRD11	C12ORF4	CACNA1H	ALDH5A1	ACE	ALDH5A1	ANK3	AARS1	CACNA1F	ABCA13	AMT	GSTP1	AARS2	ARID1B	ADSL	ARX	ADNP
ANK2	ARX	CACNA1C	CADM1	AMT	ACSL4	AP1S2	ANKRD11	AARS2	CACNA1H	ABCA7	AP1S2	ATG12	AASS	ARL6	AHDC1	ATRX	ADSL
ASH1L	AVPR1A	CC2D1A	CNTN4	ANKRD11	ACTB	ARX	AP1S2	AASS	CNTNAP2	ACE	ARID1B	BDNF	ABAT	ARX	ALDH5A1	AUTS2	AFF2
BRWD3	BCL11A	CNOT3	CNTNAP2	ARID1B	ACTG1	ATRX	ARHGEF6	ABAT	EN2	ACHE	ARX	AOC1	ABCA7	ASPM	ANK2	BDNF	AGO1
CAMK2A	BRAF	CNTN6	CNTNAP5	BRAF	ACTN4	BCKDK	ARX	ABCA13	FOXP2	ACTN4	ATRX	ATG16L1	ABCC8	ATRX	ANK3	BRAF	AHI1
CAMK2B	CACNA1C	CERT1	CXCR3	CACNA1C	ADA	BRAF	ATP10A	ABCA2	GABRA5	ADA	BCKDK	ATG5	ABCC9	AVPR1A	ANKRD11	CACNA1C	AIFM1
CC2D1A	CC2D1A	CSNK2A1	DIAPH3	CDKL5	ADAR	CACNA1C	ATRX	ABCA5	GABRB3	ADCY3	BRAF	C3	ABCD1	BBIP1	ARHGEF9	CASK	ALDH5A1
CELF4	CDKL5	CTNND2	DLGAP2	CHD2	ADCY5	CASK	AUTS2	ABCA7	GABRG3	ADCY5	CACNA1C	CD14	ABCD4	BBS1	ARID1B	CDKL5	ANK3
CHAMP1	CHD2	DHCR7	DPP10	CHD7	ADGRG1	CDKL5	AVPR1A	ABCB5	HOXA1	ADK	CASK	CTLA4	ABHD5	BBS2	ARX	CHD7	ANKRD11
CHD2	CHD7	EHMT1	DPP6	CNTNAP2	ADK	CHD7	BCL11A	ABCB7	LAMB1	ADNP	CDKL5	DRD2	ACADM	BBS4	ASH1L	CHD8	AP1S2
CHD3	CNOT3	EN2	FABP5	CREBBP	ADNP	CHD8	BDNF	ABCC12	MECP2	ADORA2A	CHD7	FUT2	ACADS	BBS5	ASXL3	CNTNAP2	AP4B1
CHD8	CNTN6	FBXO11	FABP7	DHCR7	ADSL	CNTNAP2	BRAF	ABCC8	NLGN3	ADORA3	CHD8	HLA-DQA1	ACADSB	BBS7	AUTS2	CREBBP	AP4E1
CIC	CNTNAP2	FOXP1	FBXO40	EHMT1	AFF2	CREBBP	BRSK2	ABCC9	NLGN4X	ADRB2	CNTNAP2	HLA-DQA2	ACAT1	BBS9	BAZ2B	DHCR7	AP4M1
CREBBP	CERT1	GAMT	FOXP1	FOXG1	AHI1	CYP27A1	CACNA1C	ABCD1	NRXN1	AFF2	CREBBP	HNMT	ACD	BBS10	BCKDK	DMD	AP4S1
CTNNB1	C12ORF4	KMT2E	FRMPD4	FOXP1	AIMP1	DHCR7	CASK	ABCD3	OXTR	AGAP1	CTNNB1	IL13	ACE	BBS12	BCL11A	DPP6	ARID1A
CTNND2	CREBBP	KMT5B	GLRA2	GRIP1	AKAP9	DMD	CDKL5	ABCD4	PCDH19	AGAP2	DHCR7	IL5	ACO2	BDNF	BRAF	EHMT1	ARID1B
DLL1	CSNK2A1	MBOAT7	GRIN2A	HDAC8	AKT3	EHMT1	CHD7	ABCG2	PDE8B	AGBL4	DYRK1A	IL6	ACOX1	BRAF	BRSK2	FGD1	ARX
DYRK1A	DHCR7	MECP2	GRIN2B	HOXA1	ALDH18A1	FGD1	CHD8	ABHD5	PTCHD1	AGMO	EHMT1	STAT4	ACP5	CACNA1C	C12orf57	FMR1	ATP13A2
EHMT1	EHMT1	MT-ATP6	GRPR	HPRT1	ALDH5A1	FMR1	CIC	ABL1	RELN	AGO1	FGD1	TNF	ACSL4	CASK	CACNA1C	FOLR1	ATP7A
EIF3F	EN2	MT-ATP8	HNRNPH2	MAGEL2	ALDH7A1	FOLR1	CNTNAP2	ACACA	RPL10	AGTR2	FMR1	FOLR2	ACTB	CBL	CACNA2D3	FOXG1	ATP8A2
ELP2	FBXO11	MT-CO1	KCNMA1	MECP2	ALG11	FOXG1	CNTNAP5	ACACB	SHANK3	AHDC1	FOLR1	MTHFR	ACTG1	CDH8	CASK	FOXP1	ATRX
FMR1	FOXG1	MT-CO2	MBD1	MED12	ALG13	FOXP1	CREBBP	ACAD9	SLC25A12	AKAP9	FOXG1	TCN2	ACVR1	CDKL5	CC2D1A	FOXP2	AUTS2
FOXP1	FOXP1	MT-CO3	MBD3	MID1	ALX4	FOXP2	CSNK2A1	ACADL	SLC6A4	AMPD1	FOXP1	ADRA2A	ACY1	CEP290	CDC42BPB	GABRB3	BCKDK
FOXP2	FOXP2	MT-CYB	MBD4	NHS	AMPD1	HPRT1	DHCR7	ACADM	SLC9A9	AMT	FOXP2	COMT	ADAMTS10	CHD7	CDKL5	GRIN2B	BCL11A
FRMPD4	GABRB3	MT-ND1	MDGA2	NIPBL	AMPD2	KDM5C	DLGAP2	ACADS	UBE3A	ANK2	GABRB3	DBH	ADAMTSL2	CNTNAP2	CHAMP1	HOXA1	BCOR
GABRB3	HDAC8	MT-ND2	MECP2	NRXN1	AMT	L1CAM	DMD	ACADSB		ANK3	SLC2A1	GAD1	ADAR	CREBBP	CHD2	HPRT1	BRAF
GRIA2	HOXA1	MT-ND3	MEF2C	NSD1	ANK2	MAGEL2	DOCK4	ACAT1		ANKRD11	GRIN2B	HTR2A	ADAT3	DCX	CHD3	KDM5C	BRWD3
GRIA3	HPRT1	MT-ND4	NLGN1	PCDH19	ANK3	MBD5	DPP10	ACAT2		ANKS1B	HDAC8	MAOA	COQ8A	DHCR7	CHD7	KIRREL3	C12ORF57
GRIN2B	KMT5B	MT-ND4L	NLGN3	POGZ	ANKRD11	MECP2	DPP6	ACBD6		ANXA1	HOXA1	MAOB	ADD3	DMD	CHD8	KLHL3	CA8
HECW2	MAGEL2	MT-ND5	NLGN4X	PQBP1	AP1S1	MED12	DPYD	ACD		APBA2	HPRT1	SLC6A4	ADK	EHMT1	CIC	L1CAM	CACNA1C
KDM5C	MBOAT7	MT-ND6	NOS1AP	PTEN	AP1S2	MEF2C	EHMT1	ACE		APBB1	KDM5C	TPH2	ADNP	ERCC6	CNOT3	LAMC3	CASK
KMT2C	MECP2	MT-RNR1	NRXN1	PTPN11	AP3B1	MID1	FAAH2	ACER3		APH1A	KIRREL3		ADRA2B	ERCC8	CNTN6	MBD5	CBL
KMT5B	MED12	MT-RNR2	NRXN2	RAD21	AP4B1	NHS	FGD1	ACMSD		AR	L1CAM		ADSL	EZH2	CNTNAP2	MECP2	CC2D1A
MAGEL2	MID1	MT-TA	PCDH10	RAI1	AP4M1	NIPBL	FMR1	ACO2		ARHGAP11B	LAMC3		AFF2	FGD1	CREBBP	MED12	CCDC22
MAOA	NHS	MT-TC	PCDH19	SCN1A	ARFGEF2	NLGN3	FOLR1	ACOT7		ARHGAP32	MBD5		AFF4	FMR1	CSDE1	MEF2C	CDKL5
MECP2	NIPBL	MT-TD	PCDH9	SCN2A	ARHGEF10	NLGN4X	FOXG1	ACOX1		ARHGAP5	MECP2		AGA	FOLR1	CTCF	MET	CDKN1C
MED12	NLGN3	MT-TE	PDZD4	SETD2	ARHGEF6	NR1I3	FOXP1	ACOX2		ARHGEF10	MED12		AHCY	FOXG1	CTNND2	MID1	CHD2
MED13	NLGN4X	MT-TF	PPP1R3F	SLC6A1	ARHGEF9	NRXN1	FOXP2	ACP5		ARHGEF9	MEF2C		AHDC1	FOXP1	CTTNBP2	NHS	CHD7
MEF2C	NRXN1	MT-TG	PTCHD1	SLC6A8	ARID1A	NSD1	GABRB3	ACSF3		ARID1B	MID1		AHI1	FOXP2	CUL3	NIPBL	CHD8
NLGN3	NSD1	MT-TH	PTEN	SMC1A	ARID1B	OPHN1	GRIN2B	ACSL4		ARNT2	NHS		AIFM1	GABRB3	DDX3X	NLGN3	CLCN4
NLGN4X	NTNG1	MT-TI	RAB39B	SMC3	ARL13B	PAFAH1B1	GRPR	ACTA1		ASAP2	NIPBL		AIMP1	GLI3	DEAF1	NLGN4X	CNTNAP2
OPHN1	OXTR	MT-TK	RIMS3	TBL1XR1	ARX	PCDH19	GSPT2	ACTB		ASH1L	NLGN3		AIP	GPC3	DHCR7	NRXN1	CREBBP
ARHGEF7	PCDH19	MT-TL1	RPL10	TCF4	ASAH1	PHF6	HOXA1	ACTG1		ASMT	NLGN4X		AKT1	HDAC8	DISC1	NSD1	CTCF
PHIP	PDE8B	MT-TL2	SH3KBP1	TSC1	ASCL1	PNKP	HPRT1	ACTL6A		ASPM	NRXN1		AKT2	HOXA1	DLG4	OPHN1	CTNNB1
POGZ	POGZ	MT-TM	SHANK2	TSC2	ASPM	PQBP1	HUWE1	ACTL6B		ASTN2	NSD1		AKT3	HPRT1	DNMT3A	PAFAH1B1	CUL3
PTCHD1	PTCHD1	MT-TN	SHANK3	UBE3A	ASXL1	PTCHD1	IL1RAPL1	ACVR1		ASXL3	NTNG1		ALDH18A1	HRAS	DSCAM	PCDH19	CYP27A1
PTEN	PTEN	MT-TP	SLC9A9	VPS13B	ASXL3	PTEN	IMMP2L	ACY1		ATP10A	OPHN1		ALDH3A2	KDM5C	DYRK1A	PDE10A	D2HGDH
RAB39B	PTPN11	MT-TQ	SYN1	ZEB2	ATP13A2	PTPN11	KATNAL2	ADAM22		ATP1A1	PAFAH1B1		ALDH4A1	KMT2D	EBF3	PHF6	DDHD2
RNASE12	PQBP1	MT-TR	SYNGAP1		ATP1A3	RAB39B	KCTD13	ADAMTS1		ATP1A3	PCDH19		ALDH5A1	KRAS	EFR3A	PNKP	DDX3X
RORB	RAD21	MT-TS1	TSPAN7		ATP6AP2	RAI1	KDM5C	ADAMTS10		ATP2B2	PHF6		ALDH6A1	L1CAM	EHMT1	PQBP1	DEAF1
SETBP1	RAI1	MT-TS2	WNK3		ATP6V0A2	RELN	KIRREL3	ADAMTSL1		ATP6V0A2	PNKP		ALDH7A1	LZTFL1	EP300	PTCHD1	DHCR7
SETD2	RELN	MT-TT			ATP7A	SCN1A	KMT5B	ADAR		ATRX	PQBP1		ALDOA	MAP2K1	FMR1	PTEN	DIS3L2
SETD5	RPL10	MT-TV			ATP8A2	SLC2A1	L1CAM	ADAT3		AUTS2	PTCHD1		ALDOB	MAP2K2	FOXG1	PTPN11	DKC1
SHANK2	SCN1A	MT-TW			ATR	SLC9A6	LAMC3	COQ8A		AVPR1A	PTEN		ALG1	MBD5	FOXP1	RAB39B	DLG3
SHANK3	SCN2A	MT-TY			ATRX	SMARCB1	MBD5	COQ8B		AVPR1B	PTPN11		ALG11	MECP2	FOXP2	RAI1	DMD
SYN1	SETD2	NBEA			AUTS2	SMC1A	MECP2	ADCY5		AZGP1	RAB39B		ALG2	MED12	GABRB3	RELN	DNMT3A
TANC2	SHANK2	NFIB			B3GALNT2	TCF4	MED12	ADD3		BAZ2B	RAD21		ALG3	MEF2C	GAMT	RPL10	DPYD
TBR1	SHANK3	NLGN3			B4GAT1	UBE2A	MEF2C	ADGRG1		BBS4	RAI1		ALG6	MET	GATM	SATB2	DYNC1H1
TCF20	SLC6A4	NLGN4x			B9D1	VPS13B	MET	ADIPOR1		BCAS1	RELN		ALG9	MID1	GIGYF1	SCN1A	DYRK1A
TCF7L2	SLC6A8	NSD1			B9D2	ZEB2	MID1	ADK		BCKDK	SCN1A		ALMS1	MKKS	GRIN2B	SCN2A	EBP
TRIP12	SLC9A9	POGZ			BBS4		NEGR1	ADNP		BCL11A	SCN2A		ALX3	MKS1	GRIP1	SHANK2	EHMT1
TSC1	SMC3	PTCHD1			BCAP31		NF1	ADPRS		BICDL1	SETBP1		ALX4	NF1	HCN1	SHANK3	EIF2S3
TSC2	SMC1A	PTEN			BCKDK		NHS	ADRA2B		BIRC6	SETD2		AMER1	NFIX	HIVEP2	SLC6A4	ELP4
UBE2A	TBL1XR1	RPL10			BCOR		NIPBL	ADSL		BRCA2	SHANK3		AMPD2	NHS	HNRNPH2	SLC9A6	EZH2
UPF3B	TBR1	SHANK3			BCS1L		NLGN3	AFF2		BRD4	SLC9A6		AMT	NIPBL	HNRNPU	SLC9A9	FGD1
WDFY3	TCF4	TBR1			BDNF		NLGN4X	AFF3		BST1	SMC1A		ANK3	NLGN3	HRAS	SMC1A	FMR1
YY1	TCF20	TCF20			BLOC1S3		NRXN1	AFF4		BTAF1	SMC3		ANKLE2	NLGN4X	IQSEC2	SNRPN	FOLR1
ZDHHC9	TRIP12	TRIP12			BLOC1S6		NSD1	AFG3L2		C15orf62	STXBP1		ANKRD11	NRAS	IRF2BPL	SOX5	FOXG1
ZMIZ1	TSC1	TSC1			BRAF		NSDHL	AGA		DIPK2A	SYNE1		ANO10	NRXN1	KANSL1	SPAST	FOXP1
ZNF292	TSC2	TSC2			BRCA2		NTNG1	AGGF1		C4B	TBL1XR1		ANTXR1	NSD1	KATNAL2	TCF4	FOXP2
	UBE3A	VAMP2			BRWD3		OCRL	AGK		CA6	TBR1		AP1S1	OPHN1	KCNB1	TSC1	FTSJ1
	VPS13B	WASF1			C12orf57		OPHN1	AGL		CACNA1B	TCF4		AP1S2	PAFAH1B1	KCNQ3	TSC2	GATAD2B
	WASF1	ZSWIM6			C12orf65		PAFAH1B1	AGMO		CACNA1D	TMEM231		AP2S1	PCDH19	KDM3B	UBE3A	GDI1
	ZEB2				C19orf12		PCDH19	AGO1		CACNA1E	TMLHE		AP3B1	PHF6	KDM5B	VPS13B	GK
					CA2		PCDH9	AGPAT2		CACNA1F	TSC1		AP3B2	PNKP	KDM6B	ZEB2	GLI3
					CA8		PDE10A	AGTPBP1		CACNA1G	TSC2		AP3D1	PQBP1	KMT2A		GNS
					CACNA1A		PDE4D	AGTR2		CACNA1H	TUBA1A		AP4B1	PTCH1	KMT2C		GPC3
					CACNA1C		PHF6	AGXT2		CACNA1I	UBE3A		AP4E1	PTCHD1	KMT2E		GRIA3
					CACNA1D		PIP5K1B	AHCY		CACNA2D1	UBE3C		AP4M1	PTEN	KMT5B		GRIK2
					CACNA1F		PNKP	AHDC1		CACNA2D3	VPS13B		AP4S1	PTPN11	KRAS		GRIN2B
					CACNA1H		PON3	AHI1		CACNB2	ZEB2		APC2	RAB39B	MAGEL2		GRIP1
					CACNB2		PQBP1	AHRR		CADM1			NAXE	RAD21	MAOA		HCCS
					CAMTA1		PTCHD1	AHSG		CADM2			APOL2	RAF1	MBD5		HDAC8
					CARD11		PTEN	AIFM1		CADPS2			APOL4	RAI1	MBOAT7		HGSNAT
					CASK		PTPN11	AIMP1		CAMK2A			COA8	RELN	MECP2		HPRT1
					CBS		RAB39B	AIMP2		CAMK4			APTX	RPGRIP1L	MED13		HRAS
					CC2D1A		RAI1	AKAP13		CAPN12			AQP2	RPS6KA3	MED13L		HUWE1
					CC2D2A		RBFOX1	AKT1		CAPRIN1			ARCN1	SCN1A	MEIS2		IDS
					CCDC40		RELN	AKT2		CARD11			ARFGEF2	SDCCAG8	MYT1L		IL1RAPL1
					CCDC88C		RORA	AKT3		GOLM2			ARG1	SHANK2	NAA15		KAT6A
					CDH15		RPL10	ALAD		CASK			ARHGAP31	SHANK3	NACC1		KAT6B
					CDK5RAP2		RPS6KA3	ALDH18A1		CC2D1A			ARHGDIA	SHOC2	NBEA		KCTD13
					CDKL5		SATB2	ALDH1B1		CCDC88C			ARHGEF6	SHROOM4	NDP		KDM5C
					CDON		SCN1A	ALDH3A2		CCDC91			ARHGEF9	SLC2A1	NEXMIF		KDM6A
					CENPF		SCN2A	ALDH4A1		CCNG1			ARID1A	SLC6A4	NFIX		KIF1A
					CENPJ		SHANK2	ALDH5A1		CCT4			ARID1B	SLC6A8	NLGN3		KIRREL3
					CEP135		SHANK3	ALDH6A1		CD276			ARL13B	SLC9A6	NLGN4X		KMT2A
					CEP152		SLC16A2	ALDH7A1		CD38			ARL6	SMARCA4	NR4A2		KRAS
					CEP290		SLC6A4	ALDOA		CD99L2			ARMC5	SMARCB1	NRXN1		L1CAM
					CEP41		SLC9A6	ALDOB		CDC42BPB			ARSA	SMARCE1	NRXN3		L2HGDH
					CEP63		SLC9A9	ALG1		CDH10			ARSB	SMC1A	NSD1		LAMC3
					CHD2		SMC1A	ALG11		CDH11			ARSL	SMC3	PACS1		LAMP2
					CHD7		SMG6	ALG12		CDH13			ARV1	SOS1	PCDH19		LAS1L
					CHD8		SNRPN	ALG13		CDH22			ARX	SPRED1	PHF21A		LINS1
					CHMP1A		SOX5	ALG14		CDH8			ASAH1	TCF4	PHF3		LRP2
					CHRM3		SPAST	ALG2		CDH9			ASL	TRAPPC9	POGZ		MAGEL2
					CIB2		ST7	ALG3		CECR2			ASNS	TRIM32	POMGNT1		MAN1B1
					CLCN4		STK3	ALG6		CELF4			ASPA	TSC1	PPP1CB		MAOA
					CLIC2		SYNGAP1	ALG8		CELF6			ASPH	TSC2	PPP2R5D		MAP2K1
					CLN8		TBR1	ALG9		CEP135			ASPM	TTC8	PQBP1		MAP2K2
					CNGB3		TCF4	ALKBH8		CEP290			ASS1	TUBA1A	PRR12		MBD5
					CNTNAP2		TSC1	ALMS1		CEP41			ASXL1	UBE3A	PSMD12		MBTPS2
					COASY		TSC2	ALPI		CGNL1			ASXL2	VPS13B	PTCHD1		MECP2
					COL4A1		UBE3A	ALPL		CHD1			ATIC	WDPCP	PTEN		MED12
					CPLANE1		VPS13B	ALX1		CHD2			ATL1	ZEB2	PTPN11		MED13L
					CPT2		ZEB2	ALX3		CHD3			ATP1A2		RAB39B		MED23
					CRADD		ZNF507	ALX4		CHD8			ATP1A3		RAD21		MEF2C
					CRBN		ZNF804A	AMACR		CHMP1A			ATP2A2		RAF1		MID1
					CREBBP		ZNHIT6	AMER1		CHRM3			ATP5F1A		RAI1		MYT1L
					CRIPT			AMMECR1		CHRNA7			ATP6AP1		RELN		NAA10
					CRPPA			AMPD1		CHRNB3			ATP6AP2		RERE		NAGLU
					CSPP1			AMPD2		CIB2			ATP6V0A2		RFX3		NDP
					CTC1			AMT		CIC			ATP6V1A		SCN1A		NEXMIF
					CTNNA3			ANGPTL6		CLASP1			ATP6V1B2		SCN2A		NF1
					CTNNB1			ANK2		CLN8			ATP7A		SCN8A		NFIX
					CUL3			ANKH		CLTCL1			ATP8A2		SETBP1		NHS
					CUL4B			ANKLE2		CMIP			ATPAF2		SETD2		NIPBL
					CUL7			ANKRD11		CNGB3			ATR		SETD5		NLGN4X
					CYB5R3			ANKS1A		CNKSR2			ATRX		SGSH		NRAS
					CYP11B1			ANKS1B		CNOT3			AUH		SHANK2		NRXN1
					CYP27A1			ANKS3		CNR1			AUTS2		SHANK3		NRXN3
					DARS2			ANO10		CNTN3			AVPR2		SIN3A		NSD1
					DCAF17			ANO3		CNTN4			B3GALNT2		SLC6A1		NSDHL
					DCX			ANTXR1		CNTN5			B3GALT6		SLC9A6		NSUN2
					DDC			ANXA1		CNTN6			B3GLCT		SMAD4		OCRL
					DDX3X			AP1S1		CNTNAP2			B3GAT3		SMARCC2		OFD1
					DHCR7			AP1S2		CNTNAP3			B4GALT1		SON		OPHN1
					DKC1			AP2S1		CNTNAP4			B4GALT7		SOX5		OTC
					DLG3			AP3B1		CNTNAP5			B9D1		SPAST		PACS1
					DNM1			AP3B2		COL28A1			BBIP1		STXBP1		PAFAH1B1
					DOCK8			AP3D1		CPEB4			BBS1		STXBP5		PCDH19
					DPYD			AP4B1		CPT2			BBS10		SYNGAP1		PDHA1
					DRD3			AP4E1		CSMD1			BBS12		TANC2		PGK1
					DST			AP4M1		CSNK1E			BBS2		TAOK1		PHF6
					DTNBP1			AP4S1		CTCF			BBS4		TBC1D20		PHF8
					DYM			AP5Z1		CTNNA3			BBS5		TBCK		PIGN
					DYNC1H1			APAF1		CTNNB1			BBS7		TBL1XR1		PNKP
					DYRK1A			APBA2		CTNND2			BBS9		TBR1		POGZ
					EDN3			APC2		CTTNBP2			BCAP31		TCF20		PORCN
					EDNRB			NAXE		CUL3			BCKDHA		TCF4		PQBP1
					EEF1A2			APOL2		CUL7			BCKDHB		TLK2		PRPS1
					EFTUD2			APOL4		CUX1			BCL11A		TNRC6B		PTCH1
					EHMT1			COA8		CUX2			BCL11B		TRAF7		PTCHD1
					EIF2B1			APTX		CX3CR1			BCOR		TRIO		PTEN
					EIF2B2			AQP2		CYFIP1			BCS1L		TRIP12		PTPN11
					EIF2B3			ARCN1		CYLC2			BMP4		TSC1		PURA
					EIF2B4			ARF1		CYP11B1			BMPER		TSC2		RAB39B
					EIF2B5			ARFGEF2		DAGLA			BOLA3		TSHZ3		RAD21
					EIF4E			ARG1		DAPP1			BRAF		UBE3A		RAF1
					ELOVL4			ARHGAP24		DDC			BRAT1		UPF3B		RAI1
					EMX2			ARHGAP31		DDX3X			BRCA2		VPS13B		RARS2
					EP300			ARHGAP4		DDX53			BRF1		WAC		RBM10
					EPB41L1			ARHGDIA		DEAF1			BRPF1		WDFY3		RIT1
					ESRRB			ARHGEF15		DENR			BRWD3		ZBTB20		RPL10
					ETFB			ARHGEF2		DIP2A			BSCL2		ZMYND11		RPS6KA3
					EXOSC3			ARHGEF4		DIP2C			BSND		ZNF292		SATB2
					FAM126A			ARHGEF6		DISC1			BTD		ZNF407		SCN1A
					FANCB			ARHGEF9		DIXDC1			BTK		ZNF462		SCN2A
					FBN1			ARID1A		DLG1			BUB1B				SETBP1
					FGA			ARID1B		DLGAP1			TWNK				SETD2
					FGD1			ARID2		DLGAP2			HIKESHI				SETD5
					FGFR2			ARID4A		DLGAP3			UQCC3				SGSH
					FGFR3			ARL13B		DLX2			C12ORF57				SHANK2
					FH			ARL14EP		DLX6			MTRFR				SHANK3
					FKRP			ARL3		DMXL2			C19orf12				SHOC2
					FKTN			ARL6		DNAH10			C2CD3				SLC16A2
					FLNA			ARL6IP6		DNAH17			CPLANE1				SLC25A1
					FLVCR1			ARMC9		DNAH3			C8orf37				SLC6A1
					FMR1			ARNT2		DNER			CA2				SLC6A4
					FOLR1			ARSA		DNMT3A			CA5A				SLC6A8
					FOXC1			ARSL		DOCK1			CA8				SLC9A6
					FOXG1			ARSF		DOCK4			CACNA1A				SMARCA2
					FOXL2			ARSH		DOCK8			CACNA1C				SMARCA4
					FOXP1			ARV1		DPP10			CACNA1D				SMARCB1
					FOXP2			ARVCF		DPP4			CACNG2				SMARCE1
					FTL			ARX		DPP6			CAD				SMC1A
					FTO			ASAH1		DPYD			CAMK2A				SOS1
					FTSJ1			ASB1		DPYSL2			CAMK2B				SOX11
					G6PD			ASCC3		DPYSL3			CAMTA1				SOX5
					GABRB3			ASCL1		DRD1			CANT1				SPRED1
					GAD1			ASH1L		DRD2			CARS2				STXBP1
					GAMT			ASL		DRD3			KNL1				SYN1
					GATM			ASMT		DSCAM			CASK				SYNGAP1
					GCK			ASNS		DST			CBL				TAF1
					GDI1			ASPA		DUSP15			CBS				TBL1XR1
					GDNF			ASPM		DVL3			CC2D1A				TBR1
					GFAP			ASS1		DYDC1			CC2D2A				TCF12
					GIGYF2			ASTN1		DYDC2			CCBE1				TCF20
					GJC2			ASTN2		DYNC1H1			CCDC115				TCF4
					GK			ASXL1		DYRK1A			CCDC174				THOC2
					GLI2			ASXL2		EFR3A			CCDC22				TIMM8A
					GLRB			ASXL3		EHMT1			CCDC28B				TMEM231
					GMPPA			ATAD1		EIF3G			CEP83				TMLHE
					GMPPB			ATAD3A		EIF4E			CCDC88A				TRAPPC9
					GNAO1			ATCAY		ELAVL2			CCDC88C				TRIO
					GNAS			ATG5		ELAVL3			CCND2				TSC1
					GPC3			ATIC		ELOVL2			CD96				TSC2
					GPHN			ATL1		ELP4			CDC45				TSPAN7
					GPT2			ATN1		EMSY			CDC6				TUBA1A
					GPX1			ATP10A		EN2			CDH15				TUSC3
					GRIA3			ATP11C		EP300			CDK13				UBE2A
					GRID2			ATP13A2		EP400			CDK5				UBE3A
					GRIK2			ATP13A4		EPC2			CDK5RAP2				UNC80
					GRIN1			ATP1A1		EPHB2			CDK6				UPF3B
					GRIN2A			ATP1A2		EPPK1			CDKL5				USP9X
					GRIN2B			ATP1A3		ERBIN			CDKN1C				VPS13B
					GRIP1			ATP1B4		ERG			CDON				WAC
					HBB			ATP2A1		ERMN			CDT1				WDR45
					HCCS			ATP2A2		ESR2			ADA2				WDR81
					HCFC1			ATP2B2		ESRRB			CENPE				YWHAE
					HCN1			ATP2B3		ETFB			CENPF				ZC4H2
					HDAC4			ATP2B4		EXOC3			CENPJ				ZDHHC9
					HDAC8			ATP2C2		EXOC5			CEP104				ZEB2
					HEPACAM			ATP4A		EXOC6			CEP120				ZMYND11
					HERC2			ATP5F1A		EXOC6B			CEP135				ZNF407
					HNRNPU			ATP5F1D		EXT1			CEP152				ZNF711
					HOXA1			ATP5F1E		FABP5			CEP164
					HPRT1			ATP6AP1		FAM47A			CEP19
					HPS1			ATP6AP2		CIBAR2			CEP290
					HPS4			ATP6V0A2		FAN1			CEP41
					HPS5			ATP6V0C		FAT1			CEP55
					HPS6			ATP6V1A		FBN1			CEP57
					HRAS			ATP6V1B2		FBXO11			CEP63
					HSD17B10			ATP6V1E1		FBXO33			CERS1
					HSPD1			ATP7A		FBXO40			CFH
					HUWE1			ATP7B		FCRL6			CFHR1
					HYDIN			ATP8A2		FEZF2			CFHR3
					IDS			ATPAF2		FGA			CHAMP1
					IER3IP1			ATR		FHIT			CHD1
					IFIH1			ATRIP		FOXP1			CHD2
					IGBP1			ATRN		FOXP2			CHD4
					IGF1			ATRX		FRK			CHD7
					IGF1R			ATXN10		GABBR2			CHD8
					IL1RAPL1			AUH		GABRA4			CHI3L1
					INPP5E			AUTS2		GABRB3			CHKB
					INVS			AVPR2		GABRG3			CHMP1A
					IQSEC2			B3GALNT2		GALNT13			CHRNA4
					IRX5			B3GALT6		GALNT14			CHST14
					ITGA7			B3GLCT		GALNT8			CIC
					ITGB3			B3GAT3		GAS2			CIT
					ITPR1			B4GALNT1		GDA			CKAP2L
					JAG1			B4GALT1		GGNBP2			CLCN4
					KANK1			B4GALT7		GIGYF1			CLCNKA
					KAT6A			B4GAT1		GIGYF2			CLCNKB
					KAT6B			B9D1		GLIS1			CLIC2
					KATNB1			B9D2		GLO1			CLN3
					KCNB1			BAZ1A		GLRA2			CLN5
					KCNC1			BAZ1B		GNAS			CLN8
					KCNC3			BAZ2B		GNB1L			CLP1
					KCND3			BBIP1		GPC4			CLPB
					KCNJ10			BBOX1		GPC6			CLPP
					KCNK9			BBS1		GPD2			CNKSR2
					KCNMA1			BBS10		GPHN			CNNM2
					KCNQ2			BBS12		GPR37			CNTN2
					KCNQ3			BBS2		GPR85			COASY
					KDM5C			BBS4		GPX1			COG2
					KDM6A			BBS5		GRIA1			COG4
					KIF11			BBS7		GRID1			COG6
					KIF1A			BBS9		GRID2			COL11A2
					KIF5C			BCAP31		GRID2IP			COL13A1
					KIF7			BCKDHA		GRIK2			COL18A1
					KIRREL3			BCKDHB		GRIK3			COL2A1
					KMT2A			BCKDK		GRIK4			COL4A1
					KMT2C			BCL11A		GRIK5			COL4A2
					KMT2D			BCL11B		GRIN1			CERT1
					KNL1			BCOR		GRIN2A			COLEC11
					KRAS			BCORL1		GRIN2B			COQ2
					L1CAM			BCS1L		GRIP1			COQ4
					LAMA1			BDNF		GRM5			COQ7
					LAMA2			BEND2		GRM7			COQ9
					LAMB1			BICD2		GSTM1			CORO1A
					LAMC3			BIRC6		GTF2I			COX10
					LAMP2			BLM		GUCY1A2			COX14
					LARGE1			BLNK		HDLBP			COX15
					LEP			BMP2		HECTD4			COX20
					LINS1			BMP3		HECW2			COX4I2
					LMX1B			BMP4		HIVEP3			COX6B1
					LRBA			BMPER		HLA-A			COX7B
					LRP2			BOD1		HLA-B			COX8A
					LZTR1			BOLA3		HLA-DRB1			CPS1
					MAGEL2			BPTF		HLA-G			CPT2
					MAGT1			BRAF		HMGN1			CRADD
					MAN1B1			BRAT1		HNRNPH2			CRBN
					MAOA			BRCC3		HNRNPU			CREBBP
					MBD5			BRD4		HOMER1			CRIPT
					MBTPS2			BRF1		HRAS			CRLF1
					MCCC2			BRPF1		HS3ST5			CSNK1D
					MCM4			BRSK2		HSD11B1			CSNK2A1
					MCPH1			BRWD1		HTR1B			CSPP1
					MECP2			BRWD3		HTR3A			CSTB
					MED12			BSCL2		HTR3C			CTC1
					MED13L			BSN		HYDIN			CTCF
					MED17			BSND		ICA1			CTDP1
					MED23			BTAF1		IL1R2			CTH
					MEF2C			BTD		IL1RAPL1			CTNNB1
					MEGF10			BTRC		IL1RAPL2			CTSA
					MEIS2			BUB1B		ILF2			CTSD
					MET			BUB3		IMMP2L			CUL4B
					MFRP			TWNK		INPP1			CWF19L1
					MFSD2A			HIKESHI		INTS6			CYB5R3
					MGAT2			C11orf95		IQGAP3			CYP27A1
					MIB1			C12orf4		IQSEC2			CYP27B1
					MID1			C12orf57		IRF2BPL			D2HGDH
					MITF			MTRFR		ITGB3			DAG1
					MKKS			C19orf12		ITPR1			DAO
					MKS1			MICOS13		JARID2			DAOA
					MLC1			C2CD3		JMJD1C			DARS1
					MPDZ			PCARE		KANK1			DBT
					MSMO1			CPLANE1		KAT2B			DCAF17
					MTHFR			C8orf37		KAT6A			DCC
					MTM1			CA2		KATNAL1			DCHS1
					MTOR			CA5A		KATNAL2			DCPS
					MTR			CA8		KCND2			DCX
					MYCN			CABIN1		KCND3			DDC
					MYO5A			CACHD1		KCNJ10			DDHD2
					NAA10			CACNA1A		KCNJ15			DDOST
					NAGA			CACNA1B		KCNK7			DDR2
					NALCN			CACNA1C		KCNMA1			DDX11
					NDE1			CACNA1D		KCNQ2			DDX3X
					NDP			CACNA1E		KCNQ3			DDX59
					NDST1			CACNA1G		KCTD13			DEAF1
					NDUFA1			CACNA1H		KDM4B			DEPDC5
					NECTIN1			CACNA2D1		KDM4C			DGUOK
					NEXMIF			CACNA2D2		KDM5B			DHCR24
					NF1			CACNA2D3		KDM5C			DHCR7
					NFIX			CACNB4		KDM6A			DHFR
					NHEJ1			CACNG2		KDM6B			DHTKD1
					NHS			CAD		KHDRBS2			DIAPH1
					NIPA1			CADM1		KIAA1586			DIP2B
					NIPBL			CADPS2		KIF13B			DIS3L2
					NLGN3			CALM1		KIF14			DKC1
					NLGN4X			CAMK2A		KIF5C			DLAT
					NOTCH2			CAMK2B		KIRREL3			DLD
					NPHP1			CAMK2G		KLF16			DLG3
					NPHP3			CAMK4		KMT2A			DMXL2
					NR2F1			CAMKMT		KMT2C			DNA2
					NR3C2			CAMTA1		KMT2E			DNAJC12
					NRXN1			CANT1		KMT5B			DNAJC19
					NSD1			CAPN10		KRR1			DNAJC6
					NSDHL			CAPN12		KRT26			DNM1
					NSUN2			NAXD		LAMA1			DNM1L
					NTRK1			CARS2		LAMB1			DNMT3A
					NXF5			CASK		LEO1			DNMT3B
					OCLN			CASP10		LEP			DOCK6
					OCRL			CASP2		LILRB2			DOLK
					OFD1			CASZ1		LIN7B			DONSON
					OPHN1			CAV1		LMX1B			DPAGT1
					ORC1			CBL		LRBA			DPH1
					OTC			CBS		LRFN2			DPM1
					PAFAH1B1			CC2D1A		LRFN5			DPM2
					PAH			CC2D2A		LRP2			DPYS
					PAK3			CCAR2		LRRC1			DUOXA2
					PANK2			CCBE1		LRRC4			DYM
					PAX3			CCDC115		LZTR1			DYNC1H1
					PAX6			CCDC141		LZTS2			DYRK1A
					PCDH15			CCDC174		MACROD2			DNAAF4
					PCDH19			CCDC22		MAGEL2			EARS2
					PCNT			CCDC47		MAOA			EBF3
					PDE6D			CCDC82		MAOB			EBP
					PDHA1			CCDC88A		MAPK3			ECE1
					PEX1			CCDC88C		MARK1			ECHS1
					PEX10			CCM2		MBD1			ECM1
					PEX11B			CCND2		MBD3			EDC3
					PEX12			CCNK		MBD4			EED
					PEX13			CCR1		MBD5			EEF1A2
					PEX14			CD59		MBD6			EFEMP2
					PEX16			CD96		MBOAT7			EFNB1
					PEX19			CDAN1		MCM4			EFTUD2
					PEX2			CDC42		MCM6			EHMT1
					PEX26			CDC42BPB		MCPH1			EIF2AK3
					PEX3			CDC45		MDGA2			EIF2B1
					PEX5			CDC6		MECP2			EIF2B2
					PEX6			CDCA7		MED13			EIF2B3
					PEX7			CDH10		MED13L			EIF2B4
					PGAP1			CDH11		MEF2C			EIF2B5
					PGK1			CDH15		MEGF10			EIF4A3
					PHC1			CDH2		MEGF11			ELAC2
					PHF6			CDH8		MET			ELOVL4
					PHF8			CDK10		MFRP			ELP2
					PIGA			CDK13		MIB1			EMC1
					PIGL			CDK5		MIR137			EML1
					PIGN			CDK5R1		MRTFB			ENTPD1
					PIGO			CDK5RAP2		MNT			EP300
					PIGV			CDK6		MPP6			EPB41L1
					PIK3R2			CDKL5		MSANTD2			EPG5
					PITX2			CDKN1C		MSR1			EPM2A
					PLA2G6			CDON		MTF1			ERCC1
					PLCB1			ADA2		MTHFR			ERCC2
					PLK4			CELF4		MTOR			ERCC4
					PLN			CELSR1		MUC12			ERCC5
					PLP1			CELSR2		MUC4			ERCC6
					PNKP			CELSR3		MYH10			ERCC6L2
					POGZ			CENPE		MYH4			ERCC8
					POLR3A			CENPF		MYO16			ERF
					POLR3B			CENPJ		MYO1E			ERLIN2
					POMGNT1			CEP104		MYO5A			ERMARD
					POMGNT2			CEP120		MYO5C			ESCO2
					POMK			CEP135		MYO9B			ETFA
					POMT1			CEP152		MYT1L			ETFB
					POMT2			CEP164		NAA15			ETFDH
					PORCN			CEP19		NAALADL2			ETHE1
					POT1			CEP290		NACC1			EVC
					PPOX			CEP41		NAV2			EVC2
					PPT1			CEP57		NBEA			EXOSC3
					PQBP1			CEP63		NCKAP1			EXOSC8
					PRICKLE1			CEP83		NCKAP5			EXT2
					PRKN			CEP89		NCOR1			EYA1
					PRODH			CEP97		NDUFA5			EZH2
					PRPS1			CERS1		NEO1			F2
					PRSS12			CFHR2		NEXMIF			F5
					PTCH1			CFL2		NFIA			FAM126A
					PTEN			CHAF1B		NFIB			FAM20C
					PTPN11			CHAMP1		NINL			FANCA
					PTPRC			CHAT		NIPA1			FANCC
					PTS			CHD1		NIPA2			FANCD2
					PURA			CHD1L		NLGN1			FANCE
					PYCR1			CHD2		NLGN2			FANCI
					PYCR2			CHD3		NLGN3			FANCL
					QARS1			CHD4		NLGN4X			FAR1
					RAB18			CHD6		NLGN4Y			FARS2
					RAB39B			CHD7		NOTCH2NLA			FASTKD2
					RAB3GAP1			CHD8		NPAS2			FAT4
					RAB3GAP2			CHI3L1		NR1D1			FBLN5
					RAD21			CHKB		NR2F1			FBN1
					RAI1			CHL1		NR3C2			FBXL4
					RARS2			CHMP1A		NR4A2			FBXO31
					RBBP8			CHRM3		NRCAM			FGD1
					RBFOX1			CHRNA2		NRP2			FGF14
					RBM10			CHRNA4		NRXN1			FGFR1
					RELN			CHRNA7		NRXN2			FGFR2
					RET			CHRNB2		NRXN3			FGFR3
					RIMS1			CHRNG		NSMCE3			FH
					RNASEH2A			CHST14		NTNG1			FIBP
					RNASEH2B			CHST3		NTRK1			FIG4
					RNASEH2C			CHSY1		NTRK3			FKRP
					ROGDI			CIAO1		NUAK1			FKTN
					ROR2			CIC		NUDCD2			FLNA
					RPGRIP1L			CIT		NUP133			FLNB
					RPL10			CKAP2L		NXPH1			FLVCR2
					RPS6KA3			CLASP2		ODF3L2			FMN2
					RXYLT1			CLCF1		OFD1			FMO3
					SALL1			CLCN2		OPHN1			FMR1
					SAMHD1			CLCN4		OR1C1			FOLR1
					SASS6			CLCNKA		OR2M4			FOXG1
					SATB2			CLCNKB		OR2T10			FOXP1
					SBF1			CLDN16		OR52M1			FOXP2
					SCN1A			CLEC7A		OTUD7A			FOXRED1
					SCN2A			CLIC2		OTX1			FRAS1
					SCN4A			CLIP1		OXT			FREM2
					SCN8A			CLIP2		OXTR			FRMD4A
					SCN9A			CLK2		P2RX5			FRMPD4
					SCO2			CLMP		P4HA2			FTCD
					SDCCAG8			CLN3		PAH			FTO
					SDHA			CLN5		PAK2			FTSJ1
					SEPSECS			CLN6		PARD3B			FUCA1
					SETBP1			CLN8		PATJ			GABRA1
					SETD2			CLP1		PAX5			GABRB1
					SGCA			CLPB		PCDH10			GABRB3
					SHANK2			CLPP		PCDH11X			GAD1
					SHH			CLPTM1		PCDH15			GALC
					SHROOM4			CLPTM1L		PCDH9			GALE
					SIL1			CLTC		PCDHA1			GAMT
					SIX3			CLTCL1		PCDHA10			GATA6
					SLC12A5			CMIP		PCDHA11			GATAD2B
					SLC16A2			CNKSR1		PCDHA12			GATM
					SLC25A12			CNKSR2		PCDHA13			GBA
					SLC25A15			CNNM2		PCDHA2			GBA2
					SLC25A19			CNOT3		PCDHA3			GCDH
					SLC27A4			CNPY3		PCDHA4			GCH1
					SLC2A1			CNTN2		PCDHA5			GCK
					SLC35A2			CNTN3		PCDHA6			GCSH
					SLC35A3			CNTN4		PCDHA7			GDI1
					SLC4A4			CNTN6		PCDHA8			GFAP
					SLC6A1			CNTNAP1		PCDHA9			GFM1
					SLC6A3			CNTNAP2		PCDHAC1			GJA1
					SLC6A8			CNTNAP3		PCDHAC2			GJC2
					SLC7A7			CNTNAP5		PDCD1			GK
					SLC9A6			COA3		PDE1C			GLB1
					SLC9A9			COA5		PER1			GLDC
					SLCO1B3			COA6		PER2			GLI2
					SMAD4			COA7		PEX7			GLI3
					SMARCA2			COASY		PHB			GLIS3
					SMARCA4			COG1		PHF2			GLRX5
					SMARCB1			COG2		PHF3			GLUD1
					SMARCE1			COG4		PHIP			GLUD2
					SMC1A			COG5		PHRF1			GLYCTK
					SMC3			COG6		PIK3CG			GMNN
					SMPD1			COG7		PITX1			GMPPA
					SMS			COG8		PLAUR			GMPPB
					SNAI2			COL13A1		PLCB1			GNAO1
					SNAP29			COL18A1		PLN			GNAQ
					SNIP1			COL27A1		PLXNA3			GNAS
					SOBP			COL4A1		PLXNA4			GNB1
					SOD1			COL4A2		PLXNB1			GNB5
					SOX10			CERT1		PNPLA7			GNE
					SOX2			COLEC10		POGZ			GNPAT
					SOX3			COLEC11		POLA2			GNPTAB
					SPAST			COLGALT1		POMT1			GNPTG
					SRD5A3			COMT		PON1			GNS
					ST3GAL3			COPB2		POT1			GORAB
					STAMBP			COQ2		PPFIA1			GPC3
					STIL			COQ4		PPM1D			GPI
					STRA6			COQ5		PPP1R1B			ADGRG1
					STXBP1			COQ6		PPP2R1B			GPR88
					SYN1			COQ7		PPP2R5D			GPSM2
					SYNE1			COQ9		PREX1			GPT2
					SYNGAP1			CORO1A		PRICKLE1			GRIA3
					SYNJ1			COX10		PRICKLE2			GRID2
					SYP			COX14		PRKCB			GRIK2
					TAF2			COX15		PRKDC			GRIN1
					TAF6			COX20		PRKN			GRIN2A
					TBC1D20			COX4I2		PRODH			GRIN2B
					TBC1D24			COX6B1		PRPF39			GRIP1
					TBCE			COX7B		PRUNE2			GRM1
					TBL1XR1			COX8A		PSD3			GSS
					TBX1			CPA6		PTBP2			GTF2E2
					TCF4			CPE		PTCHD1			GTPBP3
					TCTN1			CPLX1		PTEN			GUCY2D
					TCTN2			CPOX		PTGS2			GUF1
					TCTN3			CPQ		PTK7			GUSB
					TECR			CPS1		PTPN11			HAAO
					TECTA			CPT1A		PTPRB			HACE1
					TFAP2A			CPT1B		PTPRC			HADH
					TGIF1			CPT2		PTPRT			HADHA
					THRA			CRADD		PXDN			HADHB
					TIMM8A			CRB2		PYHIN1			HAL
					TINF2			CRBN		QRICH1			HAX1
					TMCO1			CREBBP		RAB11FIP5			HCCS
					TMEM138			CRELD1		RAB2A			HCFC1
					TMEM216			CRH		RAB39B			HCN1
					TMEM231			CRHR1		RAB43			HDAC6
					TMEM237			CRIPT		RAD21L1			HDAC8
					TMEM67			CRKL		RAI1			HECW2
					TMLHE			CRLF1		RANBP17			HELLS
					TPO			CRY2		RAPGEF4			HEPACAM
					TRAPPC9			CSDE1		RASSF5			HERC1
					TREX1			CSF1R		RBFOX1			HERC2
					TRMT10A			CSMD1		RBM27			HESX1
					TRPC6			CSNK2A1		REEP3			HEXB
					TSC1			CSNK2B		RELN			HGSNAT
					TSC2			CSPP1		RERE			HIBCH
					TSEN2			CSTB		RFX3			H1-4
					TSEN34			CTBP1		RGS7			HIVEP2
					TSEN54			CTC1		RHOXF1			HLCS
					TSPAN7			CTCF		RIMS1			HMGB3
					TTC21B			CTDP1		RIMS3			HNMT
					TTI2			CTH		RIT2			HNRNPH2
					TTN			CTLA4		RNF135			HNRNPK
					TUBA1A			CTNNA2		RNF38			HNRNPU
					TUBA8			CTNNA3		ROBO2			HOXA1
					TUBB2B			CTNNB1		RPL10			HPD
					TUBB3			CTNND1		RPS6KA2			HPRT1
					TUBB4A			CTNND2		RPS6KA3			HPS6
					TUBGCP4			CTR9		SAE1			HRAS
					TUBGCP6			CTSA		SAMD11			HSD17B10
					TUSC3			CTSD		SASH1			HSD17B4
					TYR			CTSF		SATB2			HSPD1
					UBE2A			CTSH		SBF1			HSPG2
					UBE3A			CTU2		SCFD2			HUWE1
					UBR1			CUL3		SCN1A			IARS1
					UPF3B			CUL4B		SCN2A			IBA57
					USH2A			CUL5		SCN4A			CILK1
					USP9X			CUL7		SCN8A			IDS
					VDR			CUX1		SCN9A			IDUA
					VLDLR			CUX2		SCP2			IER3IP1
					VPS13B			CWC27		SDC2			IFIH1
					VPS53			CWF19L1		SEMA5A			IFNG
					VRK1			CXCR4		SERPINE1			IFT140
					WAC			STEEP1		SETBP1			IFT172
					WDR45			CYB5R3		SETD1B			IFT27
					WDR62			CYC1		SETD2			IFT52
					WDR81			CYFIP1		SETD5			IFT74
					WNT1			CYFIP2		SETDB1			IGBP1
					WNT5A			CYP24A1		SETDB2			IGF1
					WWOX			CYP26B1		SEZ6L2			IGF1R
					YWHAE			CYP26C1		SGSM3			IGF2
					ZBTB18			CYP27A1		SHANK1			IKBKG
					ZDHHC9			CYP27B1		SHANK2			IL1RAPL1
					ZEB2			CYP2C9		SHANK3			IMPA1
					ZFYVE26			CYP2R1		SHOX			INPP5E
					ZIC2			CYP2U1		SIN3A			INS
					ZIC3			D2HGDH		SLC12A5			INSR
					ZNF335			DAG1		SLC1A1			IQSEC2
					ZNF41			DAOA		SLC22A15			IRX5
					ZNF423			DAPK1		SLC22A9			ISCA2
					ZNF711			DARS1		SLC24A2			CRPPA
					ZNF81			DARS2		SLC25A12			ITCH
								DBH		SLC25A27			ITGA3
								DBT		SLC25A39			ITGA7
								DBX2		SLC27A4			ITM2B
								DCAF17		SLC29A4			ITPA
								DCC		SLC35B1			ITPR1
								DCHS1		SLC38A10			IVD
								DCPS		SLC4A10			JAG1
								DCX		SLC6A1			JAM3
								DDC		SLC6A3			JPH3
								DDHD2		SLC6A4			KANSL1
								DDOST		SLC6A8			KARS1
								DDR2		SLC7A3			KAT6A
								DDX10		SLC7A5			KAT6B
								DDX11		SLC7A7			KATNAL2
								DDX24		SLC9A9			KATNB1
								DDX3X		SLCO1B3			KCNA2
								DDX53		SLITRK5			KCNB1
								DDX59		SMAD4			KCNC3
								DEAF1		SMARCA4			KCNH1
								DENND5A		SMARCC2			KCNJ1
								DENR		SMC3			KCNJ10
								DEPDC5		SMG6			KCNJ11
								DGCR2		SNAP25			KCNJ2
								DGCR6		SND1			KCNJ6
								DGCR8		SNTG2			KCNQ2
								DGKD		SOD1			KCNT1
								DGUOK		SPARCL1			KCTD17
								DHCR24		SPAST			KCTD7
								DHCR7		SPP2			KDM1A
								DHDDS		SRCAP			KDM5C
								DHFR		SRGAP3			KDM6A
								DHTKD1		SRSF11			WASHC5
								DHX30		SSPOP			RUBCN
								DIAPH1		SSRP1			KATNIP
								DIP2B		ST7			KIAA0586
								DIP2C		ST8SIA2			WASHC4
								DIS3L2		STK39			KIFBP
								DISC1		STX1A			NEXMIF
								DISP1		STXBP1			NEXMIF
								DKC1		STXBP5			KIF11
								DLAT		STYK1			KIF14
								DLD		SYAP1			KIF1A
								DLG1		SYN1			KIF2A
								DLG2		SYN2			KIF4A
								DLG3		SYNCRIP			KIF5C
								DLG4		SYNE1			KIF7
								DLGAP2		SYNGAP1			KIRREL3
								DLL1		SYNJ1			KLHL15
								DLL3		SYT17			KMT2A
								DLL4		TAF1C			KMT2C
								DLX6		TAF6			KMT2D
								DMBX1		TANC2			KPTN
								DMD		TAOK2			KRAS
								DMXL1		TBC1D31			KRT18
								DMXL2		TBC1D5			KYNU
								DNA2		TBL1X			L1CAM
								DNAH1		TBL1XR1			L2HGDH
								DNAH10		TBR1			LAGE3
								DNAH11		TBX1			LAMA1
								DNAH14		TCF20			LAMA2
								DNAH7		TCF4			LAMB1
								DNAJC12		TCF7L2			LAMB2
								DNAJC13		TDO2			LAMC3
								DNAJC19		TECTA			LAMP2
								DNAJC21		TERB2			LARGE1
								DNAJC3		TERF2			LARP7
								DNAJC5		TET2			LARS1
								DNAJC6		THBS1			LAS1L
								DNASE1L3		THRA			LBR
								DNM1		TLK2			LEP
								DNM1L		TM4SF19			P3H1
								DNMT3A		TMLHE			LHX3
								DNMT3B		TNRC6B			LIAS
								DOCK3		TOP3B			LIG4
								DOCK6		TPO			LINS1
								DOCK7		TRAF7			LIPT1
								DOLK		TRAPPC9			LIPT2
								DONSON		TRIM33			LMAN2L
								DPAGT1		TRIO			LMBRD1
								DPF2		TRIP12			LMNA
								DPH1		TRPC6			LMNB2
								DPM1		TRPM1			LONP1
								DPM2		TSC2			LRP2
								DPM3		TSHZ3			LRP5
								DPYD		TSPAN17			LRPPRC
								DPYS		TSPAN7			LYRM7
								DRD2		TSPOAP1			LYST
								DRP2		ODAD4			LZTFL1
								DSCAM		TTN			LZTR1
								DSTYK		TUBGCP5			MAB21L2
								DTNB		UBE2H			MAF
								DUOX1		UBE3A			MAG
								DUOX2		UBE3C			MAGEL2
								DUOXA2		UBN2			MAN1B1
								DVL1		UBR5			MAN2B1
								DVL3		UNC13A			MANBA
								DYM		UNC79			MAOA
								DYNC1H1		UNC80			MAP2K1
								DYNC2LI1		UPF3B			MAP2K2
								DYRK1A		USH2A			MAPRE2
								EARS2		USP15			MARS2
								EBF3		USP45			MASP1
								EBP		USP7			MAT1A
								ECE1		USP9Y			MBD5
								ECHS1		VASH1			MBOAT7
								ECM1		VDR			MBTPS2
								EDA2R		VIL1			MCCC1
								EDC3		VSIG4			MCCC2
								EDNRB		WAC			MCM4
								EED		WDFY3			MCOLN1
								EEF1A2		WNK3			MCPH1
								EEF1B2		WNT1			MECP2
								EEF2		WWOX			MED12
								EFCAB5		XPO1			MED13L
								EFHC1		YEATS2			MED17
								EFHC2		YTHDC2			MED23
								EFNB1		YWHAE			MED25
								EFR3A		ZBTB16			MEF2C
								EFL1		ZBTB20			MEGF8
								EFTUD2		ZC3H4			MEIS2
								EGF		ZMYND11			METTL23
								EHHADH		ZNF18			MFF
								EHMT1		ZNF292			MFSD2A
								EIF2AK3		ZNF385B			MFSD8
								EIF2B1		ZNF462			MGAT2
								EIF2B2		ZNF517			MGP
								EIF2B3		ZNF548			MICU1
								EIF2B4		ZNF559			MID1
								EIF2B5		ZNF626			MID2
								EIF2S3		ZNF713			MIR17HG
								EIF3F		ZNF774			MKKS
								EIF4A3		ZNF804A			MKS1
								EIF4E		ZNF827			MLC1
								EIF4ENIF1		ZWILCH			MLYCD
								ELAC2					MMAA
								ELK1					MMAB
								ELMO2					MMACHC
								ELOVL4					MMADHC
								ELP2					MNX1
								ELP4					MOCS1
								EMC1					MOCS2
								EMG1					MOGS
								EML1					MORC2
								EMX2					MPC1
								ENAH					MPDZ
								ENPP1					MPLKIP
								ENTPD1					MPV17
								EOGT					MRPL3
								EP300					MRPS22
								EPB41L1					MRPS34
								EPB42					MSMO1
								EPC2					MTFMT
								EPG5					MTHFR
								EPHA3					MTM1
								EPHA4					MTOR
								EPHA5					MTR
								EPHA7					MUSK
								EPHB2					MVK
								EPM2A					MYCN
								EPRS1					MYH3
								SELENOI					MYH8
								ERBIN					MYO5A
								ERBB4					MYT1L
								ERC1					NAA10
								ERCC1					NACC1
								ERCC2					NADK2
								ERCC3					NAGA
								ERCC4					NAGLU
								ERCC5					NAGS
								ERCC6					NALCN
								ERCC8					NANS
								ERF					NARS2
								ERLIN2					NAT8L
								ERMARD					NBN
								ESCO2					NDE1
								ESRRG					NDN
								ETFA					NSMCE3
								ETFB					NDP
								ETFDH					NDST1
								ETHE1					NDUFA1
								EVC					NDUFA10
								EVC2					NDUFA11
								EXOC4					NDUFA12
								EXOC6B					NDUFA2
								EXOSC2					NDUFA9
								EXOSC3					NDUFAF1
								EXOSC8					NDUFAF2
								EXOSC9					NDUFAF3
								EXT2					NDUFAF4
								EXTL3					NDUFAF5
								EYA1					NDUFAF6
								EZH1					NDUFB3
								EZH2					NDUFB9
								EZR					NDUFS1
								FA2H					NDUFS2
								FAAH2					NDUFS3
								FABP3					NDUFS4
								FABP7					NDUFS6
								FADD					NDUFS7
								FAM111A					NDUFS8
								FAM120A					NDUFV1
								FAM126A					NDUFV2
								RETREG1					NECAP1
								FAM151A					NEDD4L
								FAM177A1					NEU1
								FAM183A					NF1
								FAM20C					NFIA
								FAM3C					NFIX
								CCNQ					NFKB2
								RIPOR2					NFU1
								FANCB					NGF
								FAR1					NGLY1
								FARS2					NHLRC1
								FARSB					NHP2
								FASLG					NHS
								FASN					NIN
								FASTKD2					NIPBL
								FAT1					NKAIN2
								FAT3					NKX2-1
								FAT4					NKX2-5
								FBLN1					NLGN3
								FBN3					NLGN4X
								FBP1					NONO
								FBXL4					NOP10
								FBXO11					NPAS2
								FBH1					NPAS3
								FBXO28					NPAS4
								FBXO31					NPC1
								FDPS					NPC2
								FDXR					NPHP1
								FEZF2					NPR2
								FGD1					NR2F1
								FGF12					NR3C1
								FGF13					NRAS
								FGF14					NRXN1
								FGF23					NSD1
								FGF3					NSDHL
								FGF5					NSMCE2
								FGF8					NSUN2
								FGFR1					NT5C2
								FGFR2					NTRK1
								FGFR3					NTRK2
								FGFRL1					NUBPL
								FH					NUP62
								FIBP					NUS1
								FIG4					OCLN
								FKBP10					OCRL
								FKBPL					OFD1
								FKRP					OGT
								FKTN					OPA1
								FLII					OPHN1
								FLNA					ORC1
								FLNB					ORC4
								FLRT3					ORC6
								FLVCR1					OSGEP
								FLVCR2					OTC
								FMN1					OTX2
								FMN2					PACS1
								FMR1					PAFAH1B1
								FOLR1					PAH
								FOS					PAK3
								FOXC1					PALB2
								FOXE1					PANK2
								FOXG1					PARN
								FOXH1					PAX1
								FOXI1					PAX2
								FOXN1					PBX1
								FOXP1					PC
								FOXP2					PCCA
								FOXRED1					PCCB
								FRAS1					PCDH19
								FREM2					PCLO
								FRMD4A					PCNA
								FRMPD4					PCNT
								FRRS1L					PDCD1
								FRY					PDE4D
								FTCD					PDE6D
								FTL					PDGFRB
								FTO					PDHA1
								FTSJ1					PDHX
								FUCA1					PDP1
								FCSK					PDSS1
								FUT8					PEPD
								FXYD2					PER2
								G6PC1					PER3
								GABBR2					PET100
								GABRA1					PEX1
								GABRA3					PEX12
								GABRA5					PEX2
								GABRA6					PEX5
								GABRB1					PEX7
								GABRB2					PGAP1
								GABRB3					PGAP2
								GABRD					PGAP3
								GABRE					PGK1
								GABRG2					PGM3
								GABRG3					PHC1
								GABRQ					PHF6
								GABRR1					PHF8
								GABRR3					PHGDH
								GAD1					PI4KA
								GAL					PIEZO1
								GALC					PIEZO2
								GALE					PIGA
								GALNT9					PIGG
								GALNTL5					PIGL
								GALT					PIGN
								GAMT					PIGO
								GAN					PIGP
								GAP43					PIGT
								GARS1					PIGV
								GAS1					PIGW
								GATA3					PIGY
								GATA6					PIK3CA
								GATAD2B					PIK3R1
								GATM					PIK3R2
								GBA					PLA2G6
								GBA2					PLCB1
								GCDH					PLEKHG2
								GCH1					PLG
								GCLC					PLK4
								GCM2					PLOD3
								GCSH					PLP1
								GDF5					PMM2
								GDI1					PMPCA
								GDNF					PNKP
								GEMIN4					PNP
								GFAP					PNPLA6
								GFER					PNPO
								GFM1					POC1A
								GFM2					POGZ
								GFPT1					POLA1
								GGT1					POLG
								GIGYF2					POLR1C
								GIT1					POLR1D
								GJA1					POLR3A
								GJB1					POLR3B
								GJC2					POMGNT1
								GK					POMGNT2
								GLB1					POMK
								GLDC					POMT1
								GLE1					POMT2
								GLI2					POP1
								GLI3					PORCN
								GLIS3					POU1F1
								GLRA1					PPP1R15B
								GLRA2					PPP2R1A
								GLRB					PPP2R5D
								GLRX5					PPP3CA
								GLS					PPT1
								BICRA					PQBP1
								GLUD1					PRDM8
								GLUL					PRF1
								GLYCTK					PRKAR1A
								GM2A					PRKCH
								GMNN					PRKD1
								GMPPA					PRKDC
								GMPPB					PRMT7
								GNAI1					PRNP
								GNAO1					PROC
								GNAQ					PRODH
								GNAS					PRPS1
								GNB1					PRRX1
								GNB1L					PRSS12
								GNB2					PSAP
								GNB5					PSAT1
								GNE					PSMB8
								GNPAT					PSPH
								GNPTAB					PTCH1
								GNPTG					PTCH2
								GNRH1					PTCHD1
								GNS					PTDSS1
								GOLGA2					PTEN
								GON4L					PTF1A
								GORAB					PTPN11
								GOSR2					PTRH2
								GP9					PTS
								GPAA1					PUF60
								GPC3					PURA
								GPC4					PUS1
								GPC6					PUS3
								GPD2					PYCR1
								GPHN					PYCR2
								GPI					PYROXD1
								GPKOW					QDPR
								GPR101					RAB18
								ADGRG4					RAB23
								ADGRA3					RAB27A
								GPR161					RAB39B
								GPR37					RAB3GAP1
								GPR85					RAB3GAP2
								GPR88					RAC1
								GPRASP2					RAD21
								GPSM2					RAD51
								GPT2					RAF1
								GRB10					RAI1
								GRIA1					RAPSN
								GRIA2					RARB
								GRIA3					RARS1
								GRIA4					RARS2
								GRID2					RBBP8
								GRIK2					RBM10
								GRIK3					RBM28
								GRIN1					RBM8A
								GRIN2A					RBMX
								GRIN2B					RBPJ
								GRIN2D					RDH11
								GRIP1					RECQL4
								GRM1					RELN
								GRM5					RERE
								GRM7					RET
								GRM8					RFT1
								GRN					RIN2
								GRPR					RIT1
								GSPT2					RLIM
								GSS					RMRP
								GTF2E2					RNASEH1
								GTF2H5					RNASEH2A
								GTF2IRD1					RNASEH2B
								GTPBP2					RNASEH2C
								GTPBP3					RNASET2
								GUCY1A1					RNF113A
								GUF1					RNF125
								GUSB					RNF135
								GYG2					RNF168
								GYS1					RNU4ATAC
								GYS2					ROBO3
								H3-3A					ROGDI
								H3-3B					ROR2
								HAAO					RPE65
								HACE1					RPGRIP1L
								HADH					RPIA
								HAP1					RPL10
								HARS2					RPL11
								HAX1					RPS17
								HBS1L					RPS19
								HCCS					RPS23
								HCFC1					RPS6KA3
								HCN1					RRM2B
								HCN2					RSPRY1
								HCRT					RTEL1
								HDAC1					RTN4IP1
								HDAC4					RTN4R
								HDAC6					RTTN
								HDAC8					SACS
								HDLBP					SALL1
								HDX					SAMD9
								HECW2					SAMHD1
								HELLS					SASS6
								HELZ					SATB2
								HEPACAM					SBDS
								HERC1					SBF1
								HERC2					SC5D
								HES7					SCAF4
								HESX1					SCAF8
								HEXA					SCN11A
								HEXB					SCN1A
								HGSNAT					SCN2A
								HHAT					SCN8A
								HIBCH					SCN9A
								HIC1					SCO1
								HIP1					SCO2
								HIRA					SCYL1
								H1-4					SDCCAG8
								H4C3					SDHA
								H3-4					SDHAF1
								HIVEP2					SDHD
								HK1					SEC61A1
								HLA-DQB1					SEMA3E
								HLCS					SEPSECS
								HMBS					SERAC1
								HMGA2					SERPINH1
								HMGB1					SETBP1
								HMGB3					SETD2
								HMGCL					SETD5
								HMGCS2					SF3B4
								ARHGAP45					SFXN4
								HNMT					SGPL1
								HNRNPH1					SGSH
								HNRNPH2					SHANK2
								HNRNPK					SHANK3
								HNRNPL					SHH
								HNRNPR					SHOC2
								HNRNPU					SHROOM4
								HOXA1					SIK1
								HOXA2					SIL1
								HPCA					SIN3A
								HPD					SIX3
								HPRT1					SKI
								HRAS					SLC12A1
								HSD17B10					SLC12A5
								HSD17B4					SLC12A6
								HSPA9					SLC13A5
								HSPD1					SLC16A1
								HSPG2					SLC16A2
								HTR1A					SLC17A5
								HTR2A					SLC18A3
								HTR3A					SLC19A2
								HTRA1					SLC19A3
								HTRA2					SLC1A1
								HUWE1					SLC1A2
								HYLS1					SLC1A4
								IARS1					SLC20A2
								IARS2					SLC25A1
								IBA57					SLC25A12
								ICE2					SLC25A15
								CILK1					SLC25A19
								IDH2					SLC25A22
								IDS					SLC25A26
								IDUA					SLC2A1
								IER3IP1					SLC2A10
								IFIH1					SLC30A9
								IFNAR2					SLC33A1
								IFT122					SLC35A2
								IFT140					SLC35A3
								IFT172					SLC35C1
								IFT27					SLC39A14
								IFT43					SLC39A4
								IFT74					SLC39A8
								IFT88					SLC46A1
								IGBP1					SLC4A4
								IGF1					SLC52A2
								IGF1R					SLC5A5
								IGF2					SLC6A1
								IGSF1					SLC6A17
								IL10					SLC6A19
								IL11RA					SLC6A3
								IL12A					SLC6A8
								IL12B					SLC6A9
								IL12RB2					SLC7A7
								IL17F					SLC9A6
								IL17RA					SLC9A9
								IL1RAPL1					SLITRK1
								IL23R					SLX4
								IL27RA					SMAD4
								ILF2					SMARCA2
								IMMP2L					SMARCA4
								IMPA1					SMARCB1
								BPNT2					SMARCE1
								IMPDH2					SMC1A
								INO80					SMC3
								INPP4A					SMG9
								INPP5E					SMO
								INPP5K					SMOC1
								INPPL1					SMPD1
								INS					SMS
								INSR					SNAP29
								INTS1					SNIP1
								INTS6					SNORD118
								INTS8					SNRPB
								INTU					SNRPN
								INVS					SNX14
								IQCB1					SOBP
								IQGAP3					SON
								IQSEC1					SOS1
								IQSEC2					SOS2
								IRF2BPL					SOST
								IRF9					SOX10
								IRX5					SOX11
								ISCA1					SOX18
								ISCA2					SOX2
								ISCU					SOX3
								ISG15					SOX5
								CRPPA					SPARC
								ITCH					SPAST
								ITGA3					SPATA5
								ITGA4					SPECC1L
								ITGA7					SPG11
								ITGA9					SPART
								ITGB6					SPINK5
								ITK					SPR
								ITPA					SPRED1
								ITPR1					SPTAN1
								ITSN1					SPTBN2
								ITSN2					SPTBN4
								IVD					SRCAP
								IYD					SRD5A3
								JAG1					SRPX2
								JAKMIP1					SSR4
								JAM3					ST3GAL3
								JARID2					ST3GAL5
								JMJD1C					STAC3
								JRK					STAG1
								KANK1					STAMBP
								KANSL1					STAT2
								KARS1					STIL
								KAT2B					STIM1
								KAT6A					STRA6
								KAT6B					STRADA
								KATNAL2					STT3A
								KATNB1					STT3B
								KCNA1					STUB1
								KCNA2					STX11
								KCNA4					STX1B
								KCNAB1					STXBP1
								KCNAB2					SUCLA2
								KCNB1					SUCLG1
								KCNC1					SUFU
								KCNC3					SUMF1
								KCND2					SUOX
								KCND3					SURF1
								KCNG1					SYN1
								KCNH1					SYNGAP1
								KCNH7					SYP
								KCNJ1					SYT14
								KCNJ10					SZT2
								KCNJ11					TAC3
								KCNJ2					TACO1
								KCNJ6					TAF1
								KCNJ8					TAF2
								KCNK18					TAF6
								KCNK9					TANGO2
								KCNMA1					TARS2
								KCNN3					TAT
								KCNQ2					TBC1D20
								KCNQ3					TBC1D24
								KCNQ5					TBC1D7
								KCNT1					TBCD
								KCNT2					TBCE
								KCNV2					TBCK
								KCTD13					TBK1
								KCTD3					TBL1XR1
								KCTD7					TBX1
								POGLUT3					TCF12
								KDM1A					TCF4
								KDM2B					TCN2
								KDM3A					TCTN1
								KDM5A					TCTN2
								KDM5B					TCTN3
								KDM5C					TDP2
								KDM6A					TECR
								KDM6B					TELO2
								TMEM94					TERT
								WASHC5					TFAP2A
								RUBCN					TFAP2B
								KATNIP					TG
								KIAA0586					TGDS
								KIAA0753					TGFBR1
								WASHC4					TGFBR2
								KIAA1109					TH
								KIAA1210					THOC2
								KIFBP					THOC6
								KIAA1549					THRA
								LNPK					THRB
								NEXMIF					TIMM8A
								KIDINS220					TIMMDC1
								KIF11					TINF2
								KIF14					TKT
								KIF17					TM4SF20
								KIF1A					TMCO1
								KIF23					TMEM107
								KIF2A					TMEM126B
								KIF4A					TMEM138
								KIF5A					TMEM165
								KIF5C					TMEM199
								KIF7					TMEM216
								KIRREL3					TMEM231
								KISS1					TMEM237
								KLB					TMEM240
								KLC2					RXYLT1
								KLF13					TMEM67
								KLF8					TMEM70
								KLHL15					TMLHE
								KLHL24					TMTC3
								KLHL41					TNIK
								KLHL7					TP53RK
								KLLN					TP63
								KLRC4					TPK1
								KMT2A					TPP1
								KMT2B					TRAF3IP1
								KMT2C					TRAIP
								KMT2D					TRAPPC11
								KMT2E					TRAPPC9
								KNL1					TREX1
								KPNA7					TRH
								KPTN					TRIM32
								KRAS					TRIO
								KRIT1					TRIP4
								KSR2					TRMT10A
								KY					TRMT5
								KYNU					TRNT1
								L1CAM					TSC1
								L2HGDH					TSC2
								LAGE3					TSEN15
								LAMA1					TSEN2
								LAMA2					TSEN34
								LAMB1					TSEN54
								LAMC1					TSFM
								LAMC3					TSHR
								LAMP2					TSPAN7
								LARGE1					TTC19
								LARP7					TTC37
								LARS1					TTC8
								LARS2					TTI2
								LAS1L					TUBA1A
								LBR					TUBA8
								LDHB					TUBB
								LEMD3					TUBB2A
								LEO1					TUBB2B
								LEP					TUBB3
								LETM1					TUBB4A
								LFNG					TUBG1
								LGI1					TUBGCP4
								LGI4					TUBGCP6
								LGR4					TUSC3
								LHX1					TWIST1
								LHX3					TWIST2
								LIAS					TXN2
								LIG4					UBB
								LIMK1					UBE2A
								LIN7A					UBE3A
								LIN7B					UBE3B
								LINGO1					UBR1
								LINGO2					UBTF
								LINS1					UCHL1
								LIPT1					UMPS
								LIPT2					UNC80
								LLGL1					UPB1
								LMAN2L					UPF3B
								LMBR1					UQCC2
								LMBRD1					UQCRQ
								LMNB1					UROC1
								LMNB2					USP18
								LMOD3					USP27X
								LONP1					USP9X
								LPIN3					VAC14
								LRFN2					VARS1
								LRP1					VARS2
								LRP2					VAX1
								LRP6					VDR
								LRPPRC					VIPAS39
								LRRC4					VLDLR
								LRRC6					VPS11
								LRRC7					VPS13A
								LRRK1					VPS13B
								LRRTM4					VPS13C
								LTBP1					VPS33A
								LTC4S					VPS33B
								LYRM4					VPS37A
								LYRM7					VPS45
								LYST					VPS53
								LZTFL1					VRK1
								LZTR1					VWA3B
								MAB21L2					WAC
								MACF1					WDFY3
								MAD2L2					SLC4A1
								MADD
								MAF
								MAFB
								MAG
								MAGED2
								MAGEL2
								MAGI1
								MAGI2
								MAN1B1
								MAN2B1
								MANBA
								MAOA
								MAP1B
								MAP2
								MAP2K1
								MAP2K2
								MAP2K3
								MAP3K15
								MAP3K7
								MAP4
								MAPK1
								MAPK10
								MAPK3
								MAPRE2
								MARS2
								MASP1
								MAST1
								MAT1A
								MATN4
								MBD1
								MBD5
								MBD6
								MBOAT7
								MBTPS2
								MC2R
								MCCC1
								MCCC2
								MCEE
								MCF2
								MCM3AP
								MCM4
								MCOLN1
								MCPH1
								MCTP2
								MDH2
								MDN1
								ME2
								MECP2
								MED12
								MED13
								MED13L
								MED17
								MED23
								MED25
								MED27
								MEF2C
								MEGF10
								MEGF8
								MEIS2
								MESP2
								METTL23
								METTL5
								MFF
								MFHAS1
								MFRP
								MFSD2A
								MFSD8
								MGAT2
								MGAT4C
								MGME1
								MGP
								MICAL1
								MICU1
								MID1
								MID2
								MIPEP
								MKKS
								MKS1
								MKX
								MLC1
								MLLT3
								AFDN
								MLX
								MLXIPL
								MLYCD
								MMAA
								MMAB
								MMACHC
								MMADHC
								MMP8
								MN1
								MNX1
								MOCS1
								MOCS2
								MOGS
								MORC2
								MPC1
								MPDU1
								MPDZ
								MPLKIP
								MPP7
								MPV17
								MRAP
								MRI1
								MRPL10
								MRPL3
								MRPL44
								MRPS16
								MRPS2
								MRPS22
								MRPS34
								MSL3
								MSMO1
								MSTO1
								MSX2
								MTFMT
								MTHFD1
								MTHFS
								MTMR8
								MTO1
								MTOR
								MTPAP
								MTR
								MTRR
								MTSS2
								MMUT
								MVK
								MXRA5
								MXRA8
								MYCBP2
								MYCN
								MYEF2
								MYH1
								MYH10
								MYH3
								MYH8
								MYO18B
								MYO1C
								MYO1H
								MYO5A
								MYO7B
								MYO9A
								MYOCD
								MYOF
								MYRF
								MYT1
								MYT1L
								NAA10
								NAA15
								NACC1
								NADK2
								NAGA
								NAGLU
								NAGPA
								NAGS
								NALCN
								NANS
								NARS2
								NAT8L
								NAV1
								NAV2
								NBAS
								NBEA
								NBN
								NCAPD2
								NCAPD3
								NCAPG2
								NCKAP1
								NCOR1
								NCS1
								NDE1
								NDN
								NSMCE3
								NDP
								NDST1
								NDUFA1
								NDUFA10
								NDUFA11
								NDUFA12
								NDUFA13
								NDUFA2
								NDUFA4
								NDUFA6
								NDUFA9
								NDUFAF1
								NDUFAF2
								NDUFAF3
								NDUFAF4
								NDUFAF5
								NDUFAF6
								NDUFB11
								NDUFB3
								NDUFB8
								NDUFB9
								NDUFS1
								NDUFS2
								NDUFS3
								NDUFS4
								NDUFS6
								NDUFS7
								NDUFS8
								NDUFV1
								NDUFV2
								NECAP1
								NEDD4L
								NEK1
								NEK9
								NELFA
								NEU1
								NEUROD2
								NF1
								NFASC
								NFAT5
								NFE2L2
								NFIA
								NFIB
								NFIX
								NFU1
								NGF
								NGLY1
								NHEJ1
								NHLRC1
								NHLRC2
								NHP2
								NHS
								NID1
								NIN
								NIPA1
								NIPA2
								NIPBL
								NKAIN2
								NKX2-1
								NKX2-5
								NKX6-2
								NLGN1
								NLGN2
								NLGN3
								NLGN4X
								NLGN4Y
								NLRP2
								NLRP3
								NME7
								NME8
								NMNAT1
								NNT
								NOG
								NOL3
								NONO
								NOP10
								NOS1AP
								NOTCH3
								NPAP1
								NPAS3
								NPAS4
								NPC1
								NPC2
								NPEPPS
								NPHP1
								NPHP3
								NPRL2
								NPRL3
								NR0B1
								NR2F1
								NR4A2
								NRAS
								NRDC
								NRG1
								NRGN
								NRTN
								NRXN1
								NRXN2
								NRXN3
								NSD1
								NSDHL
								NSUN2
								NSUN7
								NT5C2
								NTN1
								NTNG1
								NTRK1
								NTRK2
								NTRK3
								NUBPL
								NUP107
								NUP133
								NUP62
								NUS1
								NXF5
								NXPH3
								OCLN
								OCRL
								OFD1
								OGDH
								OGT
								OMG
								OPA1
								OPA3
								OPCML
								OPHN1
								OPLAH
								OPRL1
								ORC1
								ORC4
								ORC6
								OSGEP
								OSTM1
								OTC
								OTOGL
								OTUD6B
								OTUD7A
								OTX1
								OTX2
								OXTR
								P4HA2
								P4HB
								PABPC4L
								PACS1
								PACS2
								PAFAH1B1
								PAFAH1B3
								PAH
								PAK1
								PAK3
								PAM16
								PANK2
								PANX1
								PARN
								PARP1
								PARP10
								PARS2
								PASK
								PAX1
								PAX2
								PAX3
								PAX5
								PAX6
								PAX8
								PAXBP1
								PBX1
								PC
								PCBD1
								PCCA
								PCCB
								PCDH11X
								PCDH12
								PCDH19
								PCDH7
								PCDHB16
								PCDHB4
								PCK1
								PCLO
								PCM1
								PCNA
								PCNT
								PDCD10
								PDE10A
								PDE4B
								PDE4D
								PDE6D
								PDGFB
								PDGFRB
								PDHA1
								PDHB
								PDHX
								PDP1
								PDSS1
								PDSS2
								PDYN
								PDZD2
								PECR
								PEPD
								PER1
								PER2
								PET100
								PEX1
								PEX10
								PEX11B
								PEX12
								PEX13
								PEX14
								PEX16
								PEX19
								PEX2
								PEX26
								PEX3
								PEX5
								PEX6
								PEX7
								PFKFB1
								PGAM5
								PGAP1
								PGAP2
								PGAP3
								PGK1
								PGM1
								PGM3
								PGRMC1
								PHACTR1
								PHC1
								PHF2
								PHF21A
								PHF3
								PHF6
								PHF8
								PHGDH
								PHIP
								PHKA2
								PHKG2
								PI4KA
								PIBF1
								PIEZO1
								PIEZO2
								PIGA
								PIGC
								PIGG
								PIGH
								PIGL
								PIGM
								PIGN
								PIGO
								PIGP
								PIGQ
								PIGS
								PIGT
								PIGV
								PIGW
								PIGY
								PIK3AP1
								PIK3CA
								PIK3R2
								PIK3R5
								PITRM1
								PITX3
								PLA2G6
								PLAA
								PLAGL1
								PLAT
								PLCB1
								PLCB4
								PLEKHG2
								PLK4
								PLOD3
								PLP1
								PLXNA3
								PLXNB3
								PLXND1
								PMM2
								PMPCA
								PMPCB
								PNKD
								PNKP
								PNP
								PNPLA6
								PNPLA8
								PNPO
								PNPT1
								POC1A
								POC1B
								PODXL
								POFUT1
								POGZ
								POLA1
								POLE
								POLG
								POLG2
								POLR1A
								POLR1C
								POLR1D
								POLR2A
								POLR3A
								POLR3B
								POMGNT1
								POMGNT2
								POMK
								POMT1
								POMT2
								POP1
								POR
								PORCN
								POU1F1
								POU3F2
								PPA2
								PPARGC1A
								PPIB
								PPM1B
								PPM1D
								PPM1K
								PPOX
								PPP1CB
								PPP1R15B
								PPP1R3C
								PPP2CA
								PPP2R1A
								PPP2R2B
								PPP2R2C
								PPP2R5B
								PPP2R5D
								PPP3CA
								PPT1
								PQBP1
								PRCP
								PRDM12
								PRDM8
								PRDX1
								PREPL
								PRF1
								PRICKLE1
								PRICKLE2
								PRICKLE3
								PRIMA1
								PRKAR1A
								PRKAR1B
								PRKCA
								PRKCG
								PRKD1
								PRKDC
								PRKG2
								PRKRA
								PRMT7
								PRMT9
								PRODH
								PROP1
								PLPBP
								PRPF8
								PRPS1
								PRR12
								PRRT2
								PRSS12
								PRTN3
								PRUNE1
								PSAP
								PSAT1
								PSMD12
								PSPH
								PTCH1
								PTCHD1
								PTDSS1
								PTEN
								PTF1A
								PTH
								PTH1R
								PTPN11
								PTPN22
								PTPN23
								PTPN4
								PTPRD
								PTPRK
								PTRH2
								PTS
								PUF60
								PUM1
								PURA
								PUS1
								PUS3
								NECTIN1
								PXDN
								PYCR1
								PYCR2
								QDPR
								QRICH1
								RAB11A
								RAB11B
								RAB11FIP5
								RAB18
								RAB23
								RAB27A
								RAB33B
								RAB39B
								RAB3GAP1
								RAB3GAP2
								RAC1
								RAD21
								RAD50
								RAF1
								RAI1
								RALGAPA1
								RALGAPB
								RALGDS
								RANBP2
								RAP1A
								RAP1B
								RARB
								RARS1
								RARS2
								RASA2
								RASGRP1
								RBBP8
								RBFOX1
								RBFOX3
								RBM10
								RBM28
								RBM8A
								RBPJ
								RDH11
								RECQL4
								REEP1
								RELA
								RELN
								REPS1
								RERE
								REV3L
								RFC2
								RFT1
								COP1
								RGMA
								RGR
								RGS6
								RGS7
								RHEB
								RHOBTB2
								RIC3
								RILP
								RIMS1
								RIMS3
								RIN2
								RIPK1
								RIPPLY1
								RIPPLY2
								RIT1
								RLBP1
								RLIM
								RMND1
								RNASEH2A
								RNASEH2B
								RNASEH2C
								RNASET2
								RNF113A
								RNF125
								RNF128
								RNF13
								RNF135
								RNF168
								RNF216
								ROBO1
								ROBO2
								ROBO3
								ROGDI
								ROR2
								RORA
								RORB
								ROS1
								RPGRIP1L
								RPIA
								RPL10
								RPL11
								RPL15
								RPL26
								RPL35A
								RPS19
								RPS20
								RPS23
								RPS28
								RPS6KA3
								RPS6KC1
[truncated: 642 more rows]
